# Supplementary material for: Identification of lysosomal lipolysis as an essential noncanonical mediator of adipocyte fasting and cold-induced lipolysis
Source: JCI journal article supplement (doi:10.1172/jci185340), 2025-03-16

Figure 1.

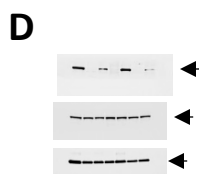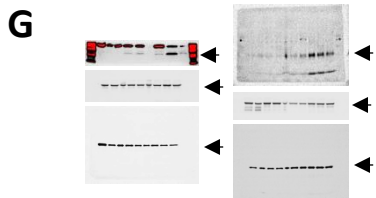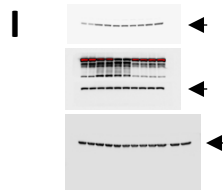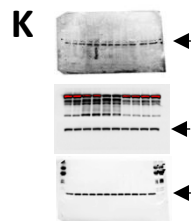

Figure 2.

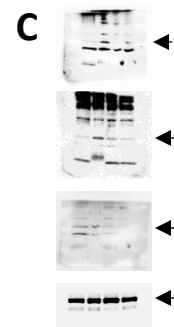

Figure 3.

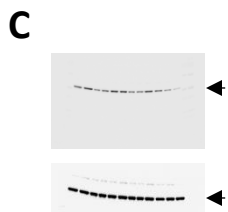

Figure 7.

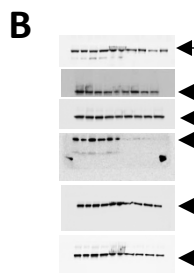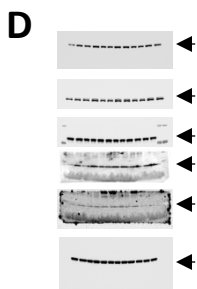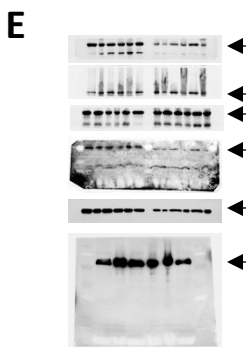

Figure S2.

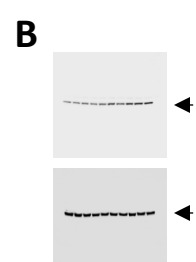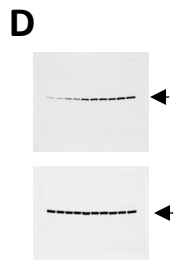

Figure S3.

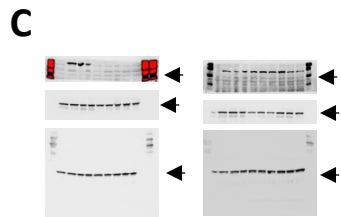

Figure S4.

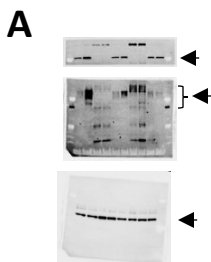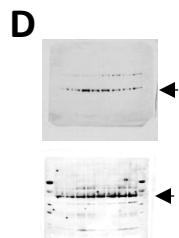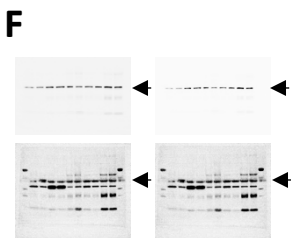

Figure S12.

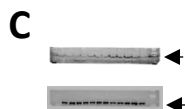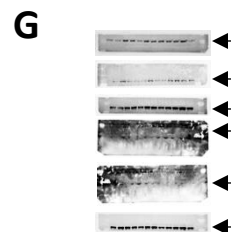

Figure S18.

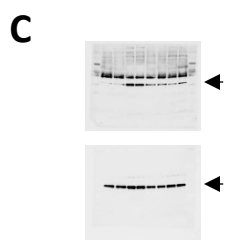

Figure S21.

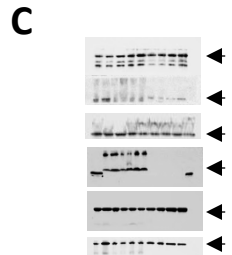

Supplement: sd2 [file 2]
